# Supplementary material for: Two New 3,4;9,10-seco-Cycloartane Type Triterpenoids fromIllicium difengpiand Their Anti-Inflammatory Activities
Source: Hindawi journal article supplement (doi:10.1155/2013/942541), 2013-01-01

## Supporting Information

### Two New 3,4;9,10-*seco* Cycloartane Type Triterpenoids from *Illicium difengpi* and their Anti-inflammatory Activities

Chuntong Li <sup>1</sup>, Fengmin Xi <sup>1</sup>, Junling Mi <sup>2</sup>, Zhijun Wu <sup>1\*</sup> and Wansheng Chen <sup>1,\*</sup>

<sup>1</sup> Department of Pharmacy, Shanghai Changzheng Hospital, Second Military Medical University, Fengyang Road 415, Shanghai 200003, PR China;  
E-Mails: chuntongli@yahoo.cn (C.L.); fengmin.x@gmail.com (F.X.);  
wuzhijun999@sina.com (Z.W.); chenwanshengsmmu@yahoo.com.cn (W.C.).

<sup>2</sup> School of Pharmacy, Chengdu University of Traditional Chinese Medicine, Liutai Road 1166, Chengdu, 611137, Sichuan, PR China; E-Mail:miboai@126.com (J.M.).

\* Author to whom correspondence should be addressed;  
E-Mail: wuzhijun999@sina.com (Z.W.);  
chenwanshengsmmu@yahoo.com.cn (W.C.)  
Tel.: +86-021-81886181; Fax: +86-021-81886191.

## Contents

- S1. **Figure S1.** High resolution ESI mass spectrum of Illiciumolide A (**1**).
- S2. **Figure S2.** IR spectrum of Illiciumolide A (**1**).
- S3. **Figure S3.**  $^1\text{H}$  NMR spectrum of Illiciumolide A (**1**) in  $\text{CDCl}_3$ .
- S4. **Figure S4.**  $^{13}\text{C}$  NMR spectrum of Illiciumolide A (**1**) in  $\text{CDCl}_3$ .
- S5. **Figure S5.**  $^1\text{H}$ - $^1\text{H}$  COSY spectrum of Illiciumolide A (**1**)  $\text{CDCl}_3$ .
- S6. **Figure S6.** HSQC spectrum of Illiciumolide A (**1**) in  $\text{CDCl}_3$ .
- S7. **Figure S7.** HMBC spectrum of Illiciumolide A (**1**) in  $\text{CDCl}_3$  (H $\rightarrow$ C).
- S8. **Figure S8.** NOESY spectrum of Illiciumolide A (**1**) in  $\text{CDCl}_3$ .
  
- S9. **Figure S9.** High resolution ESI mass spectrum of Illiciumolide B (**2**).
- S10. **Figure S10.** IR spectrum of Illiciumolide B (**2**).
- S11. **Figure S11.**  $^1\text{H}$  NMR spectrum of Illiciumolide B (**2**) in  $\text{CDCl}_3$ .
- S12. **Figure S12.**  $^{13}\text{C}$  NMR spectrum of Illiciumolide B (**2**) in  $\text{CDCl}_3$ .
- S13. **Figure S13.**  $^1\text{H}$ - $^1\text{H}$  COSY spectrum of Illiciumolide B (**2**)  $\text{CDCl}_3$ .
- S14. **Figure S14.** HSQC spectrum of Illiciumolide B (**2**) in  $\text{CDCl}_3$ .
- S15. **Figure S15.** HMBC spectrum of Illiciumolide B (**2**) in  $\text{CDCl}_3$  (H $\rightarrow$ C).
- S16. **Figure S16.** NOESY spectrum of Illiciumolide B (**2**) in  $\text{CDCl}_3$ .

**Figure S1.** High resolution ESI mass spectrum of Illiciumolide A (1).

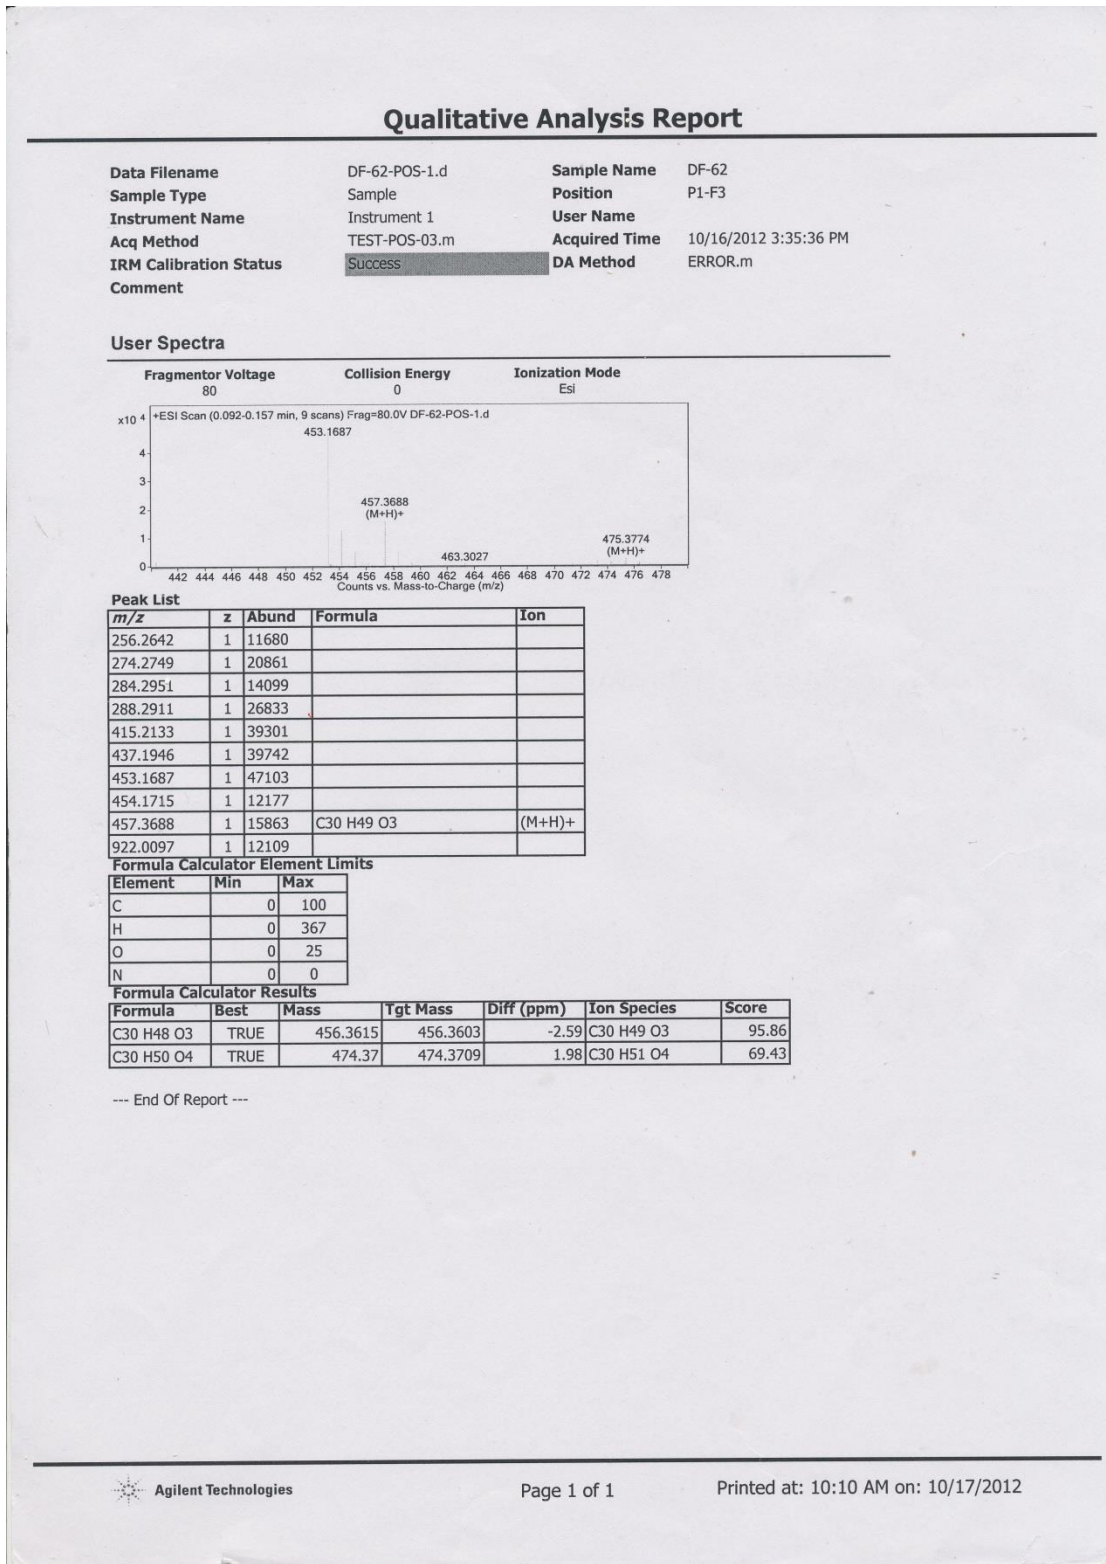

**Figure S2.** IR spectrum of Illiciumolide A (**1**).

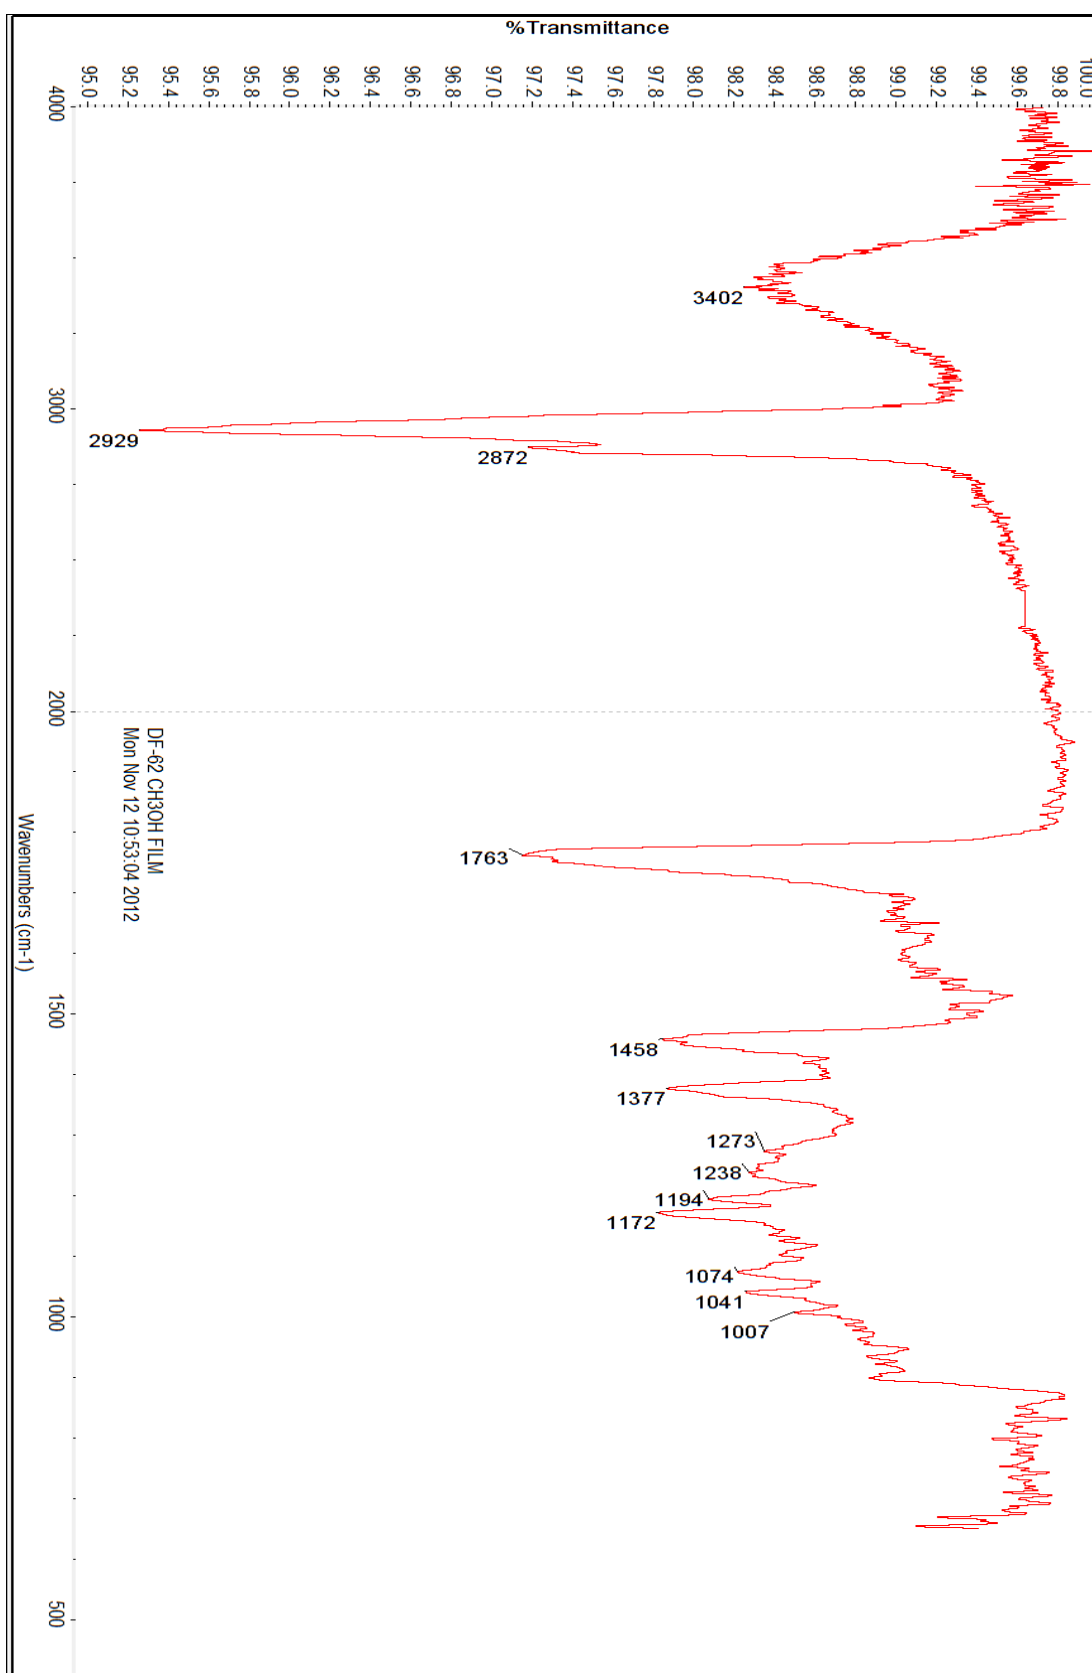

**Figure S3.**  $^1\text{H}$  NMR spectrum of Illiciumolide A (**1**) in  $\text{CDCl}_3$ .

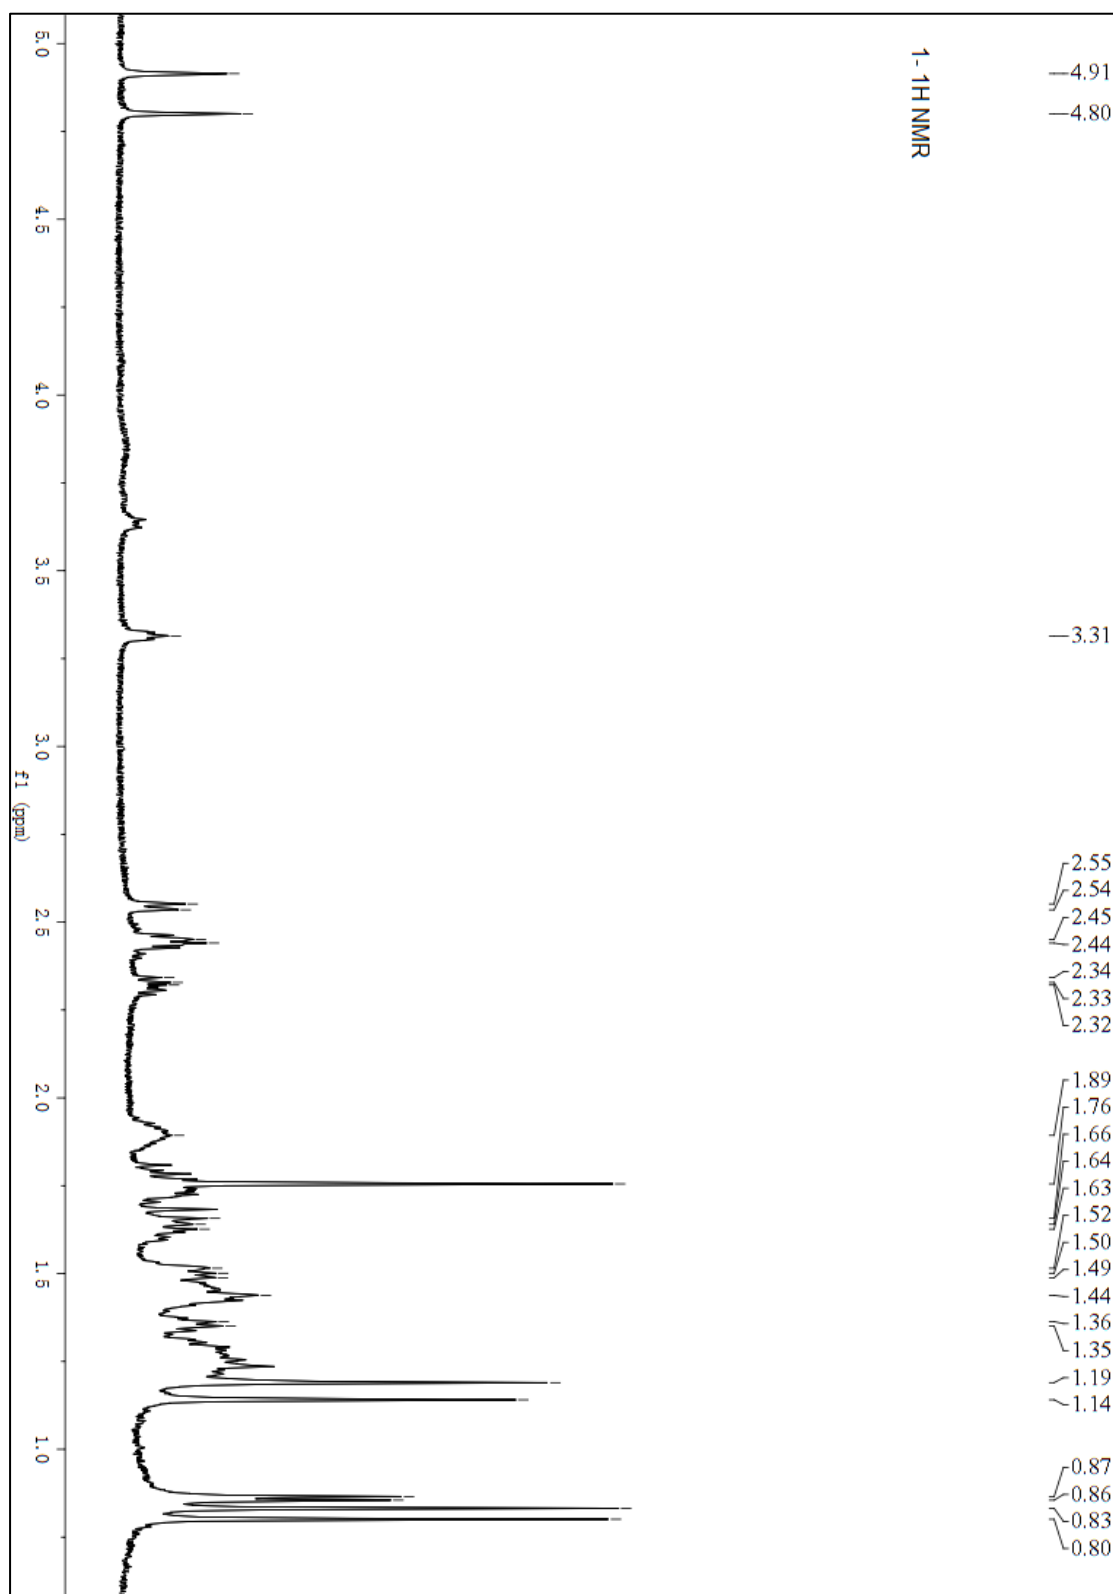

**Figure S4.**  $^{13}\text{C}$  NMR spectrum of Illiciumolide A (**1**) in  $\text{CDCl}_3$ .

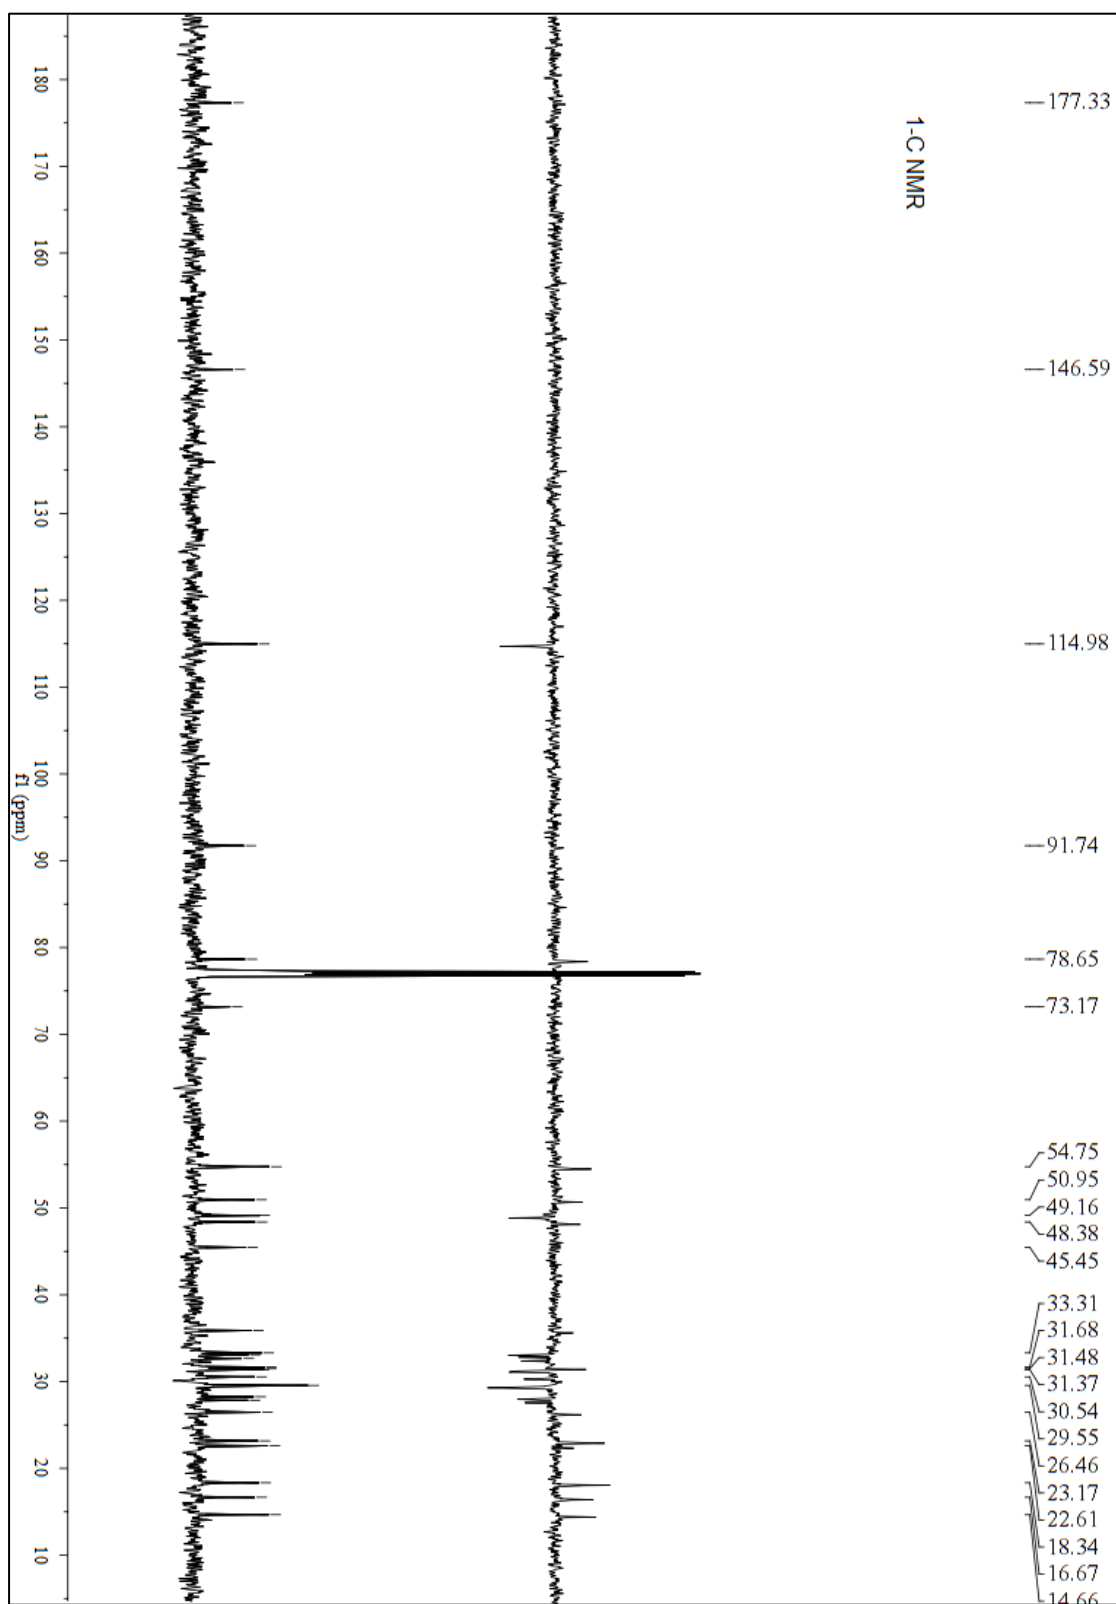

**Figure S5.**  $^1\text{H}$ - $^1\text{H}$  COSY spectrum of Illiciumolide A (**1**)  $\text{CDCl}_3$ .

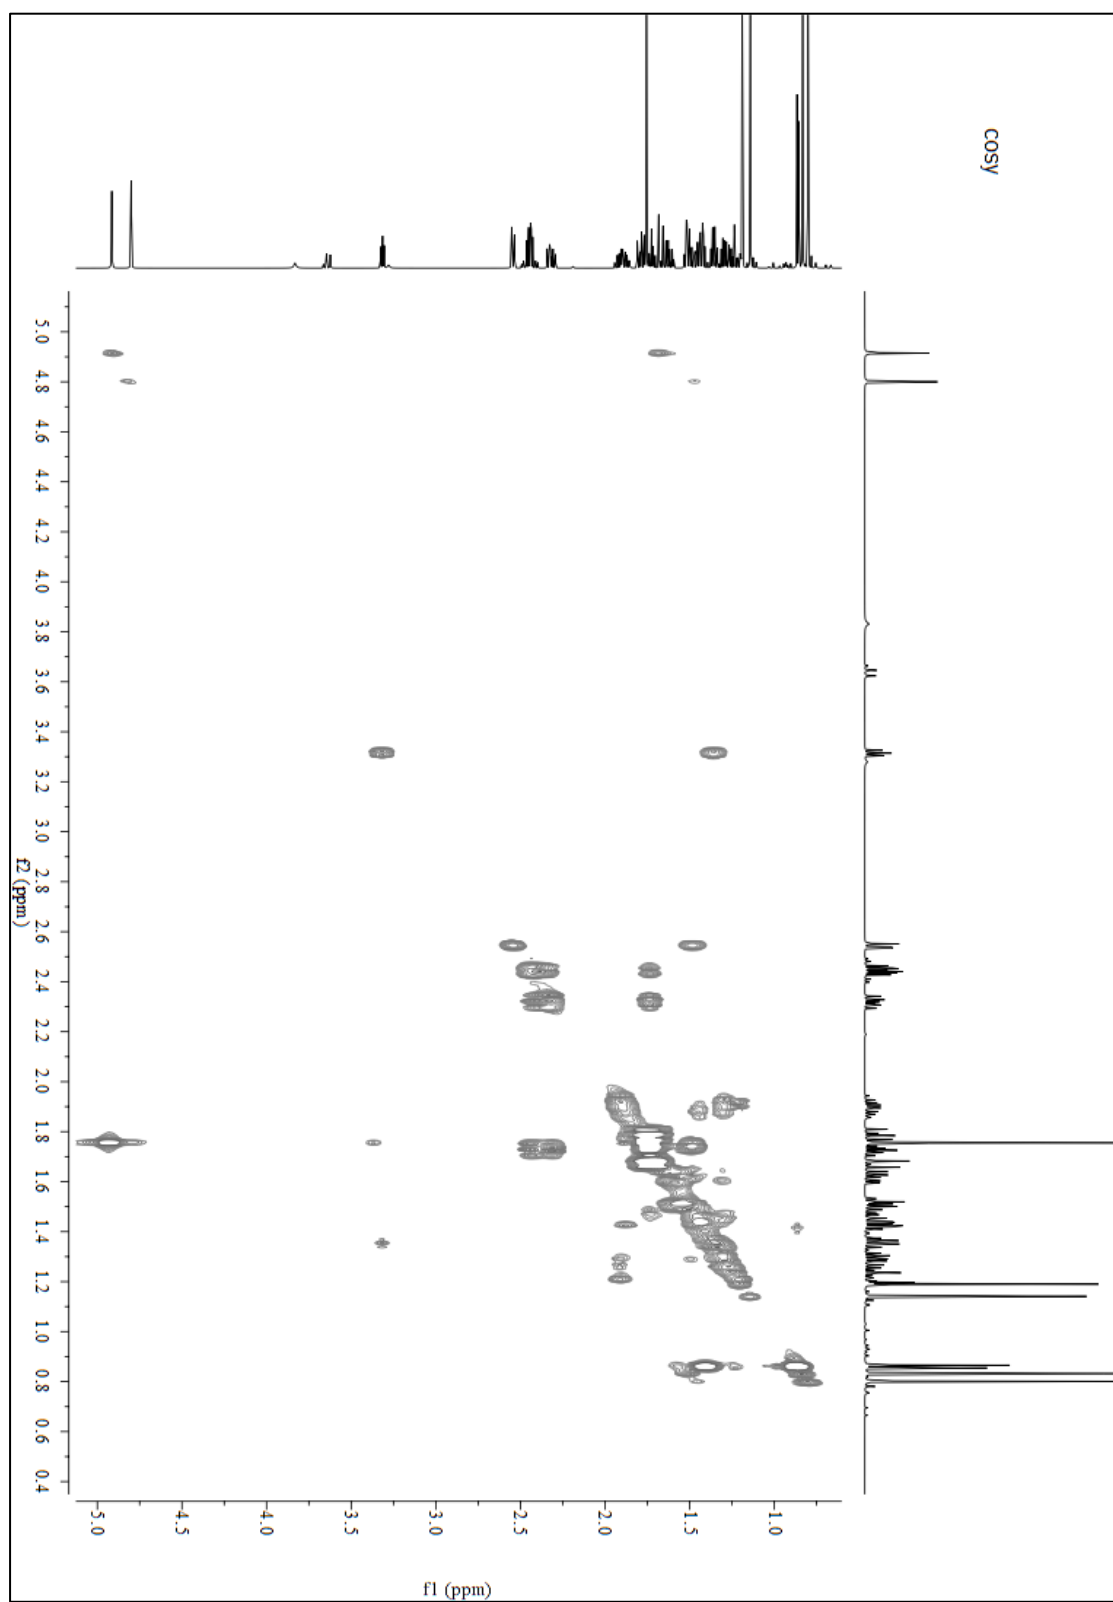

**Figure S6.** HSQC spectrum of Illiciumolide A (**1**) in CDCl<sub>3</sub>.

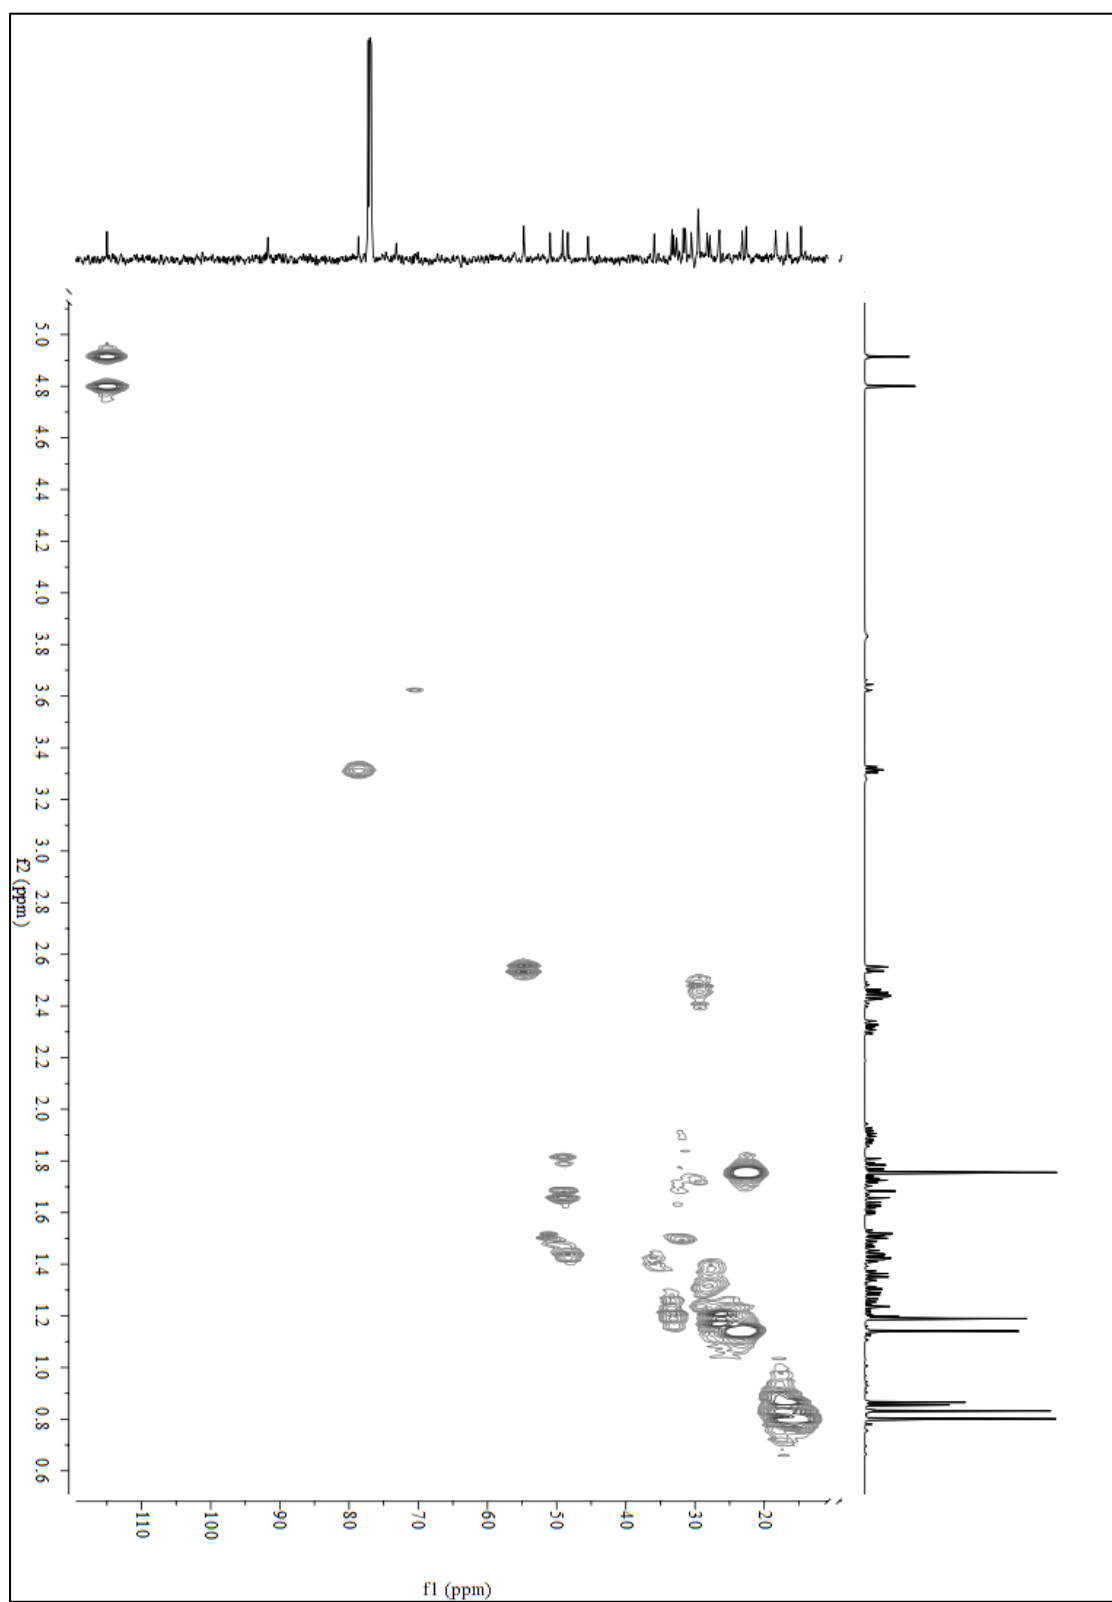



**Figure S7.** HMBC spectrum of Illiciumolide A (**1**) in CDCl<sub>3</sub> (H→C).

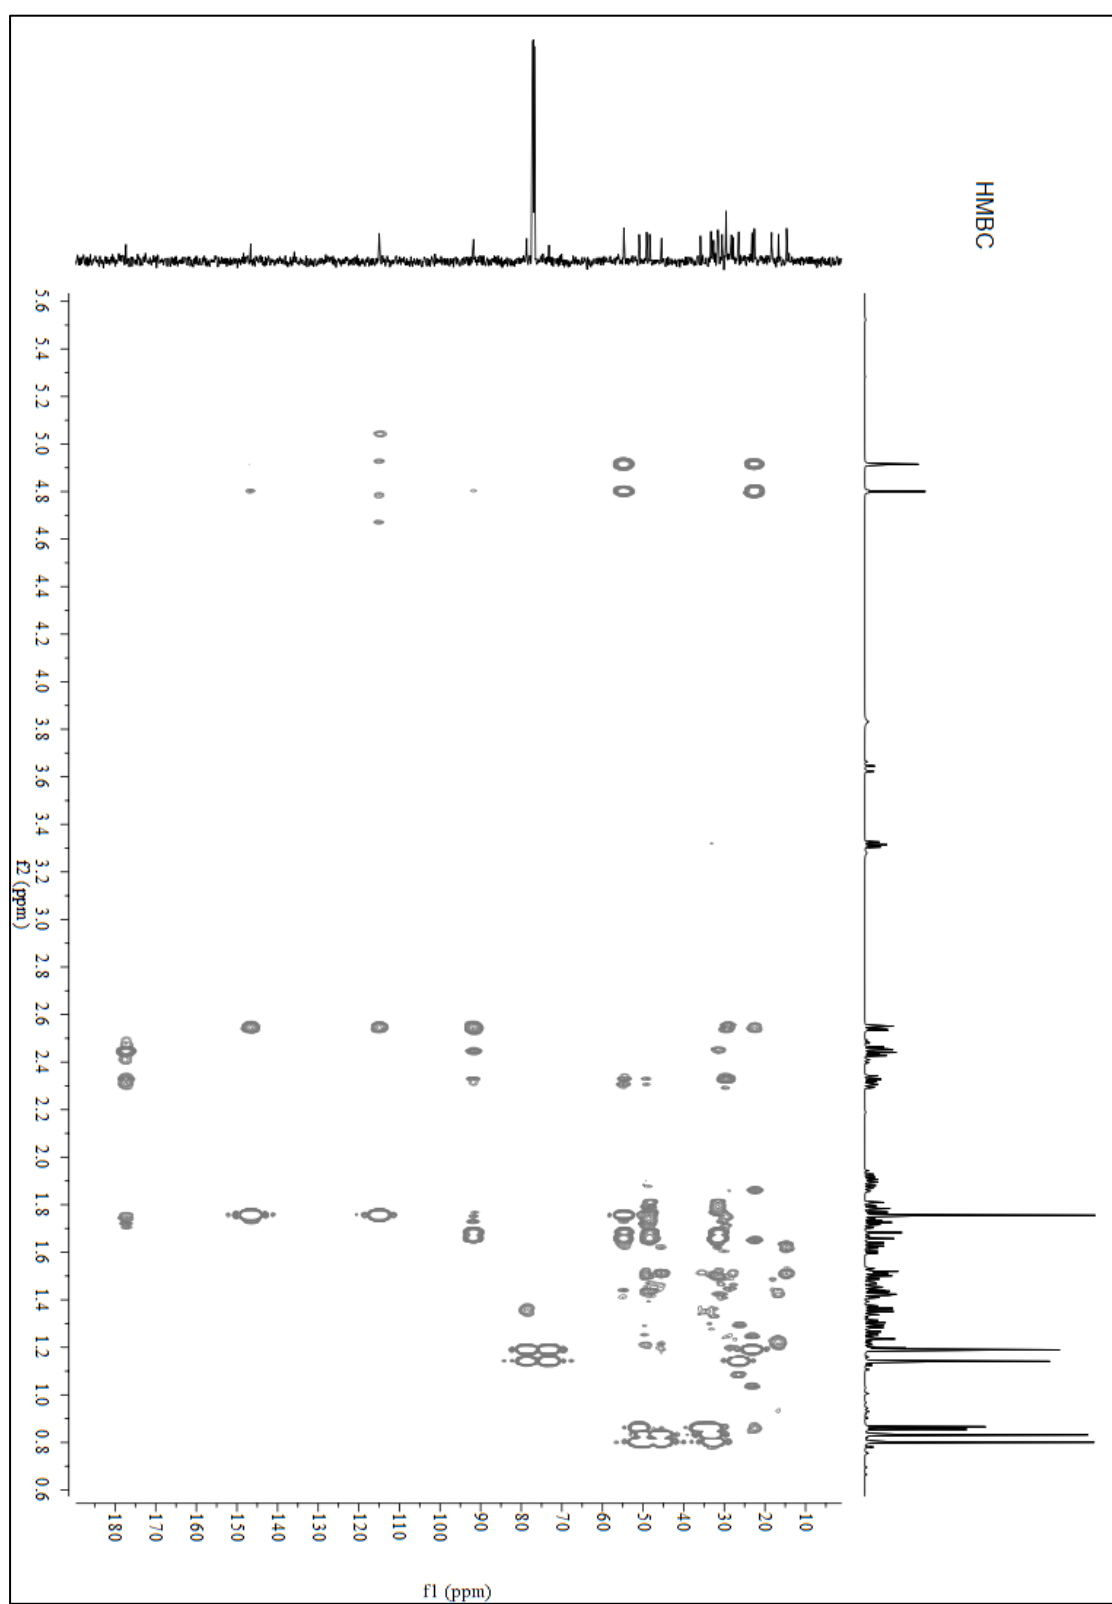

**Figure S8.** NOESY spectrum of Illiciumolide A (**1**) in CDCl<sub>3</sub>.

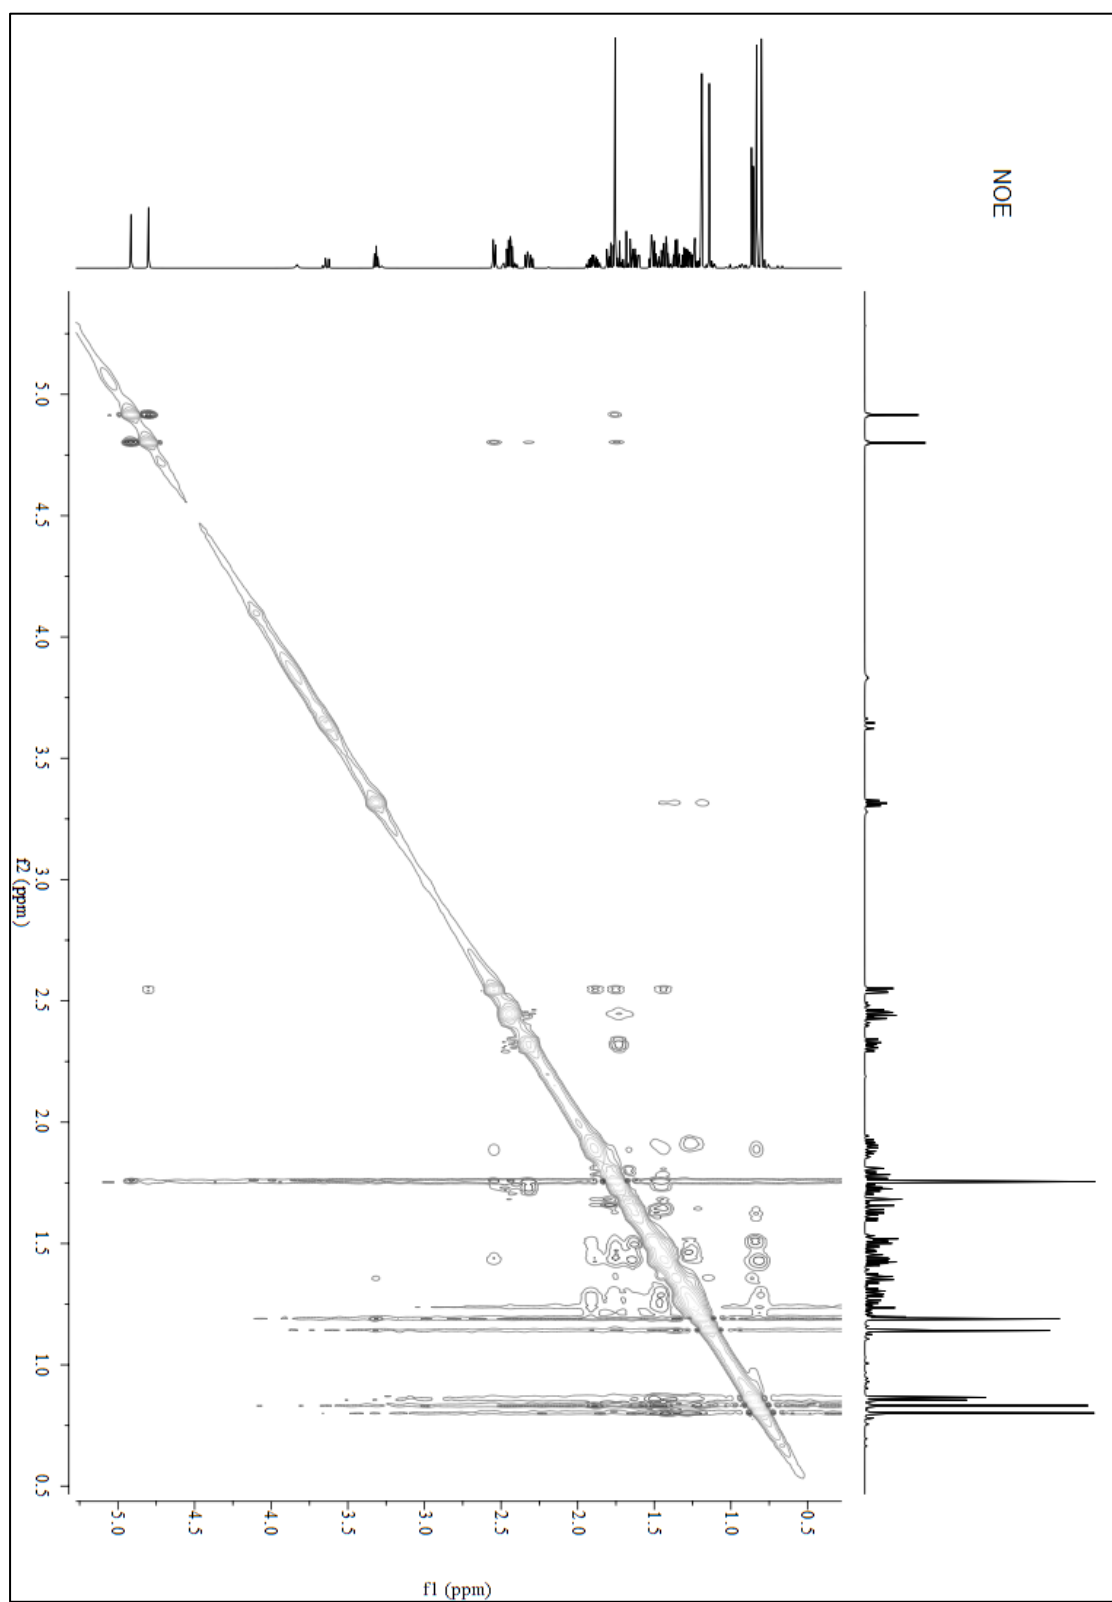

Figure S9. High resolution ESI mass spectrum of Illiciumolide B (2).

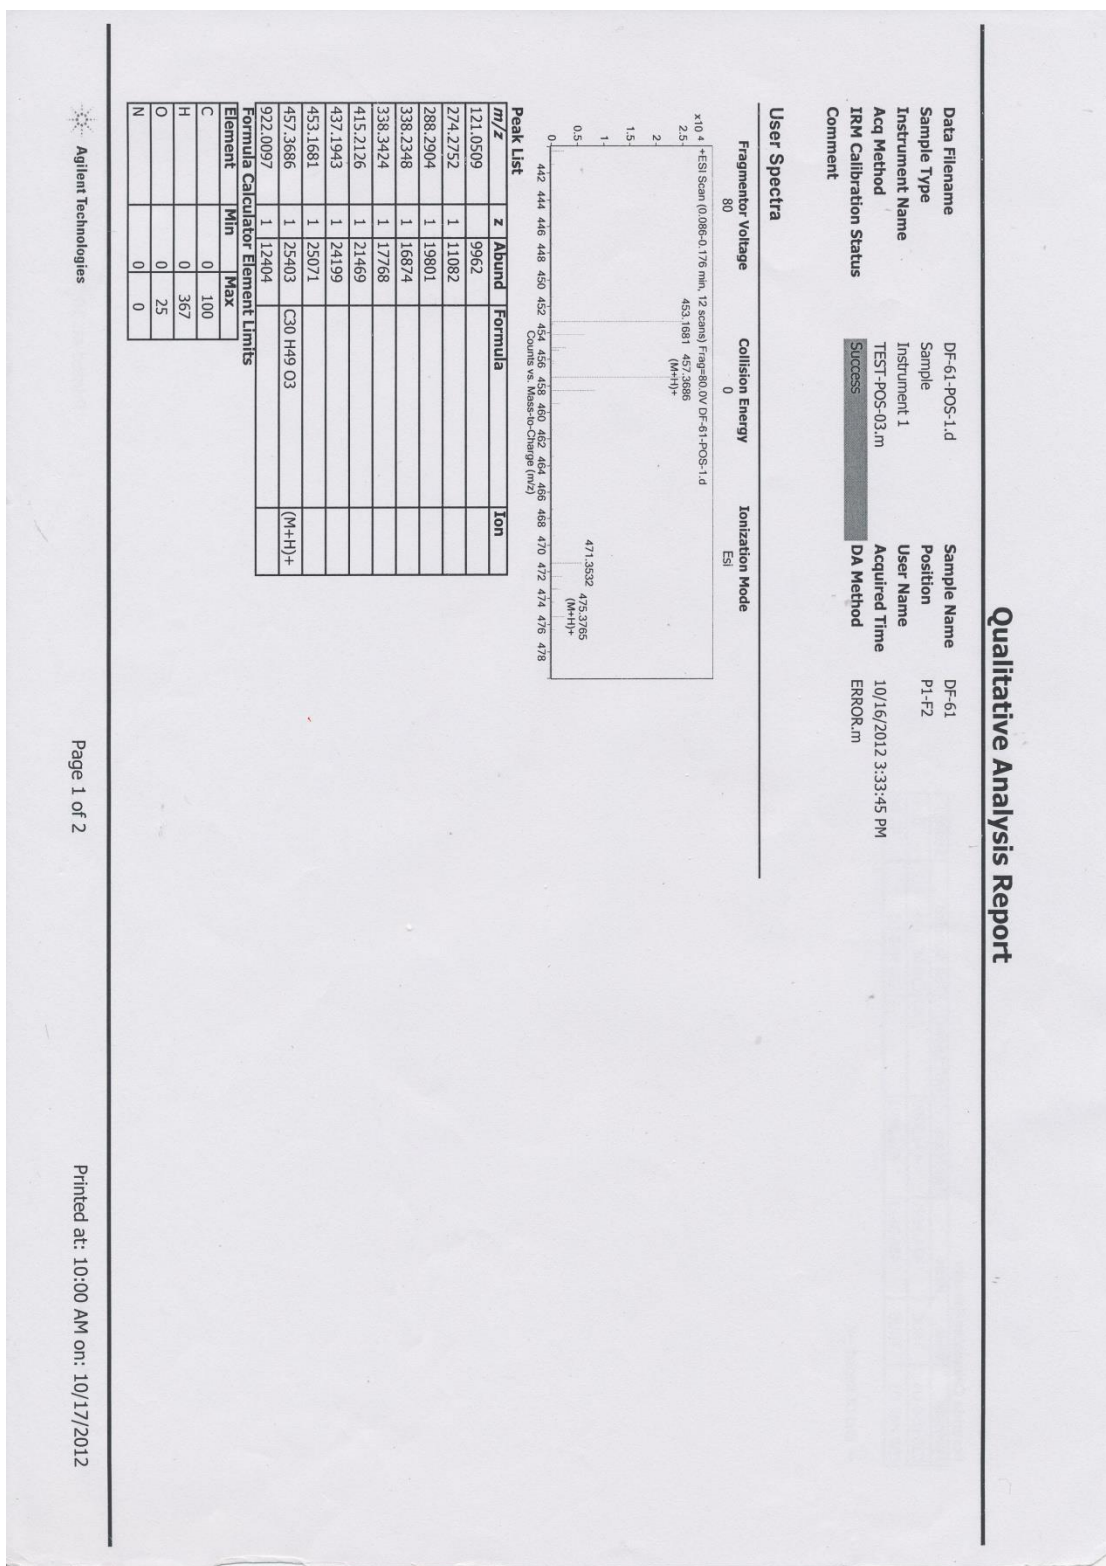

## Qualitative Analysis Report

### Formula Calculator Results

| Formula    | Best | Mass     | Tgt Mass | Diff (ppm) | Ion Species | Score |
|------------|------|----------|----------|------------|-------------|-------|
| C30 H50 O4 | TRUE | 474.3691 | 474.3709 | 3.87       | C30 H51 O4  | 80.6  |
| C30 H48 O3 | TRUE | 456.3613 | 456.3603 | -2         | C30 H49 O3  | 96.06 |

--- End Of Report ---

**Figure S10.** IR spectrum of Illiciumolide B (**2**).

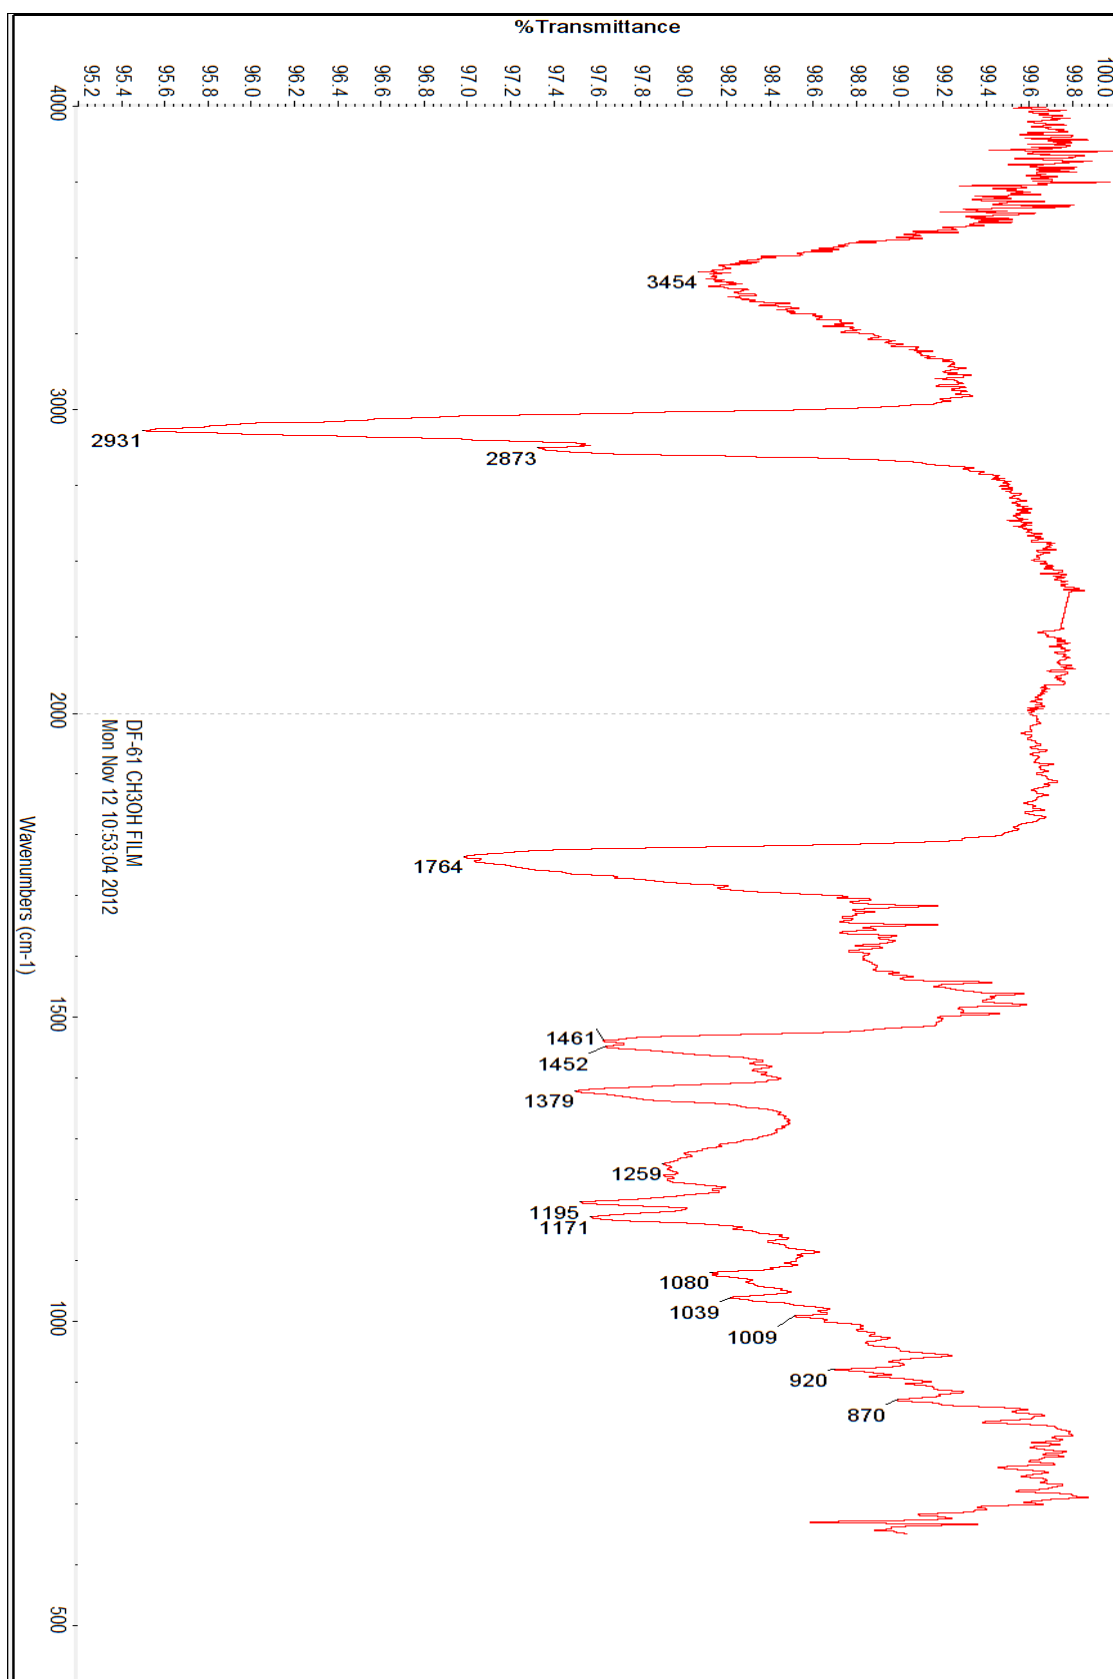

**Figure S11**  $^1\text{H}$  NMR spectrum of Illiciumolide B (**2**) in  $\text{CDCl}_3$ .

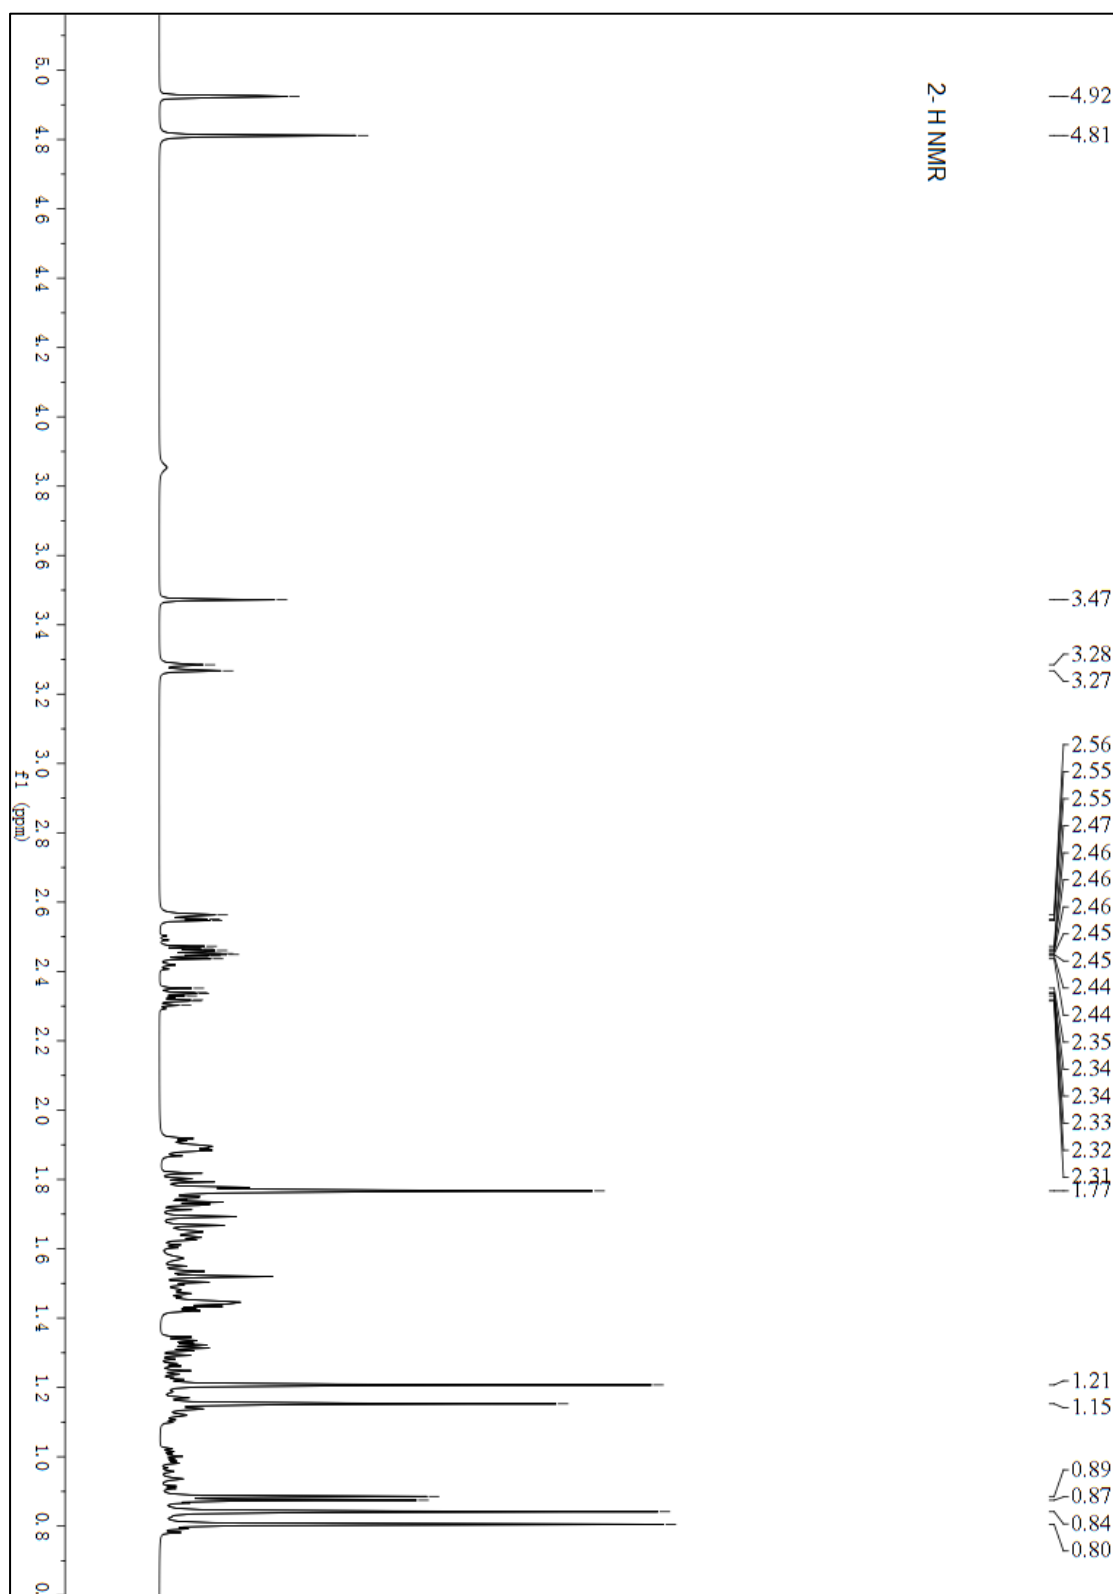

**Figure S12.**  $^{13}\text{C}$  NMR spectrum of Illiciumolide B (**2**) in  $\text{CDCl}_3$ .

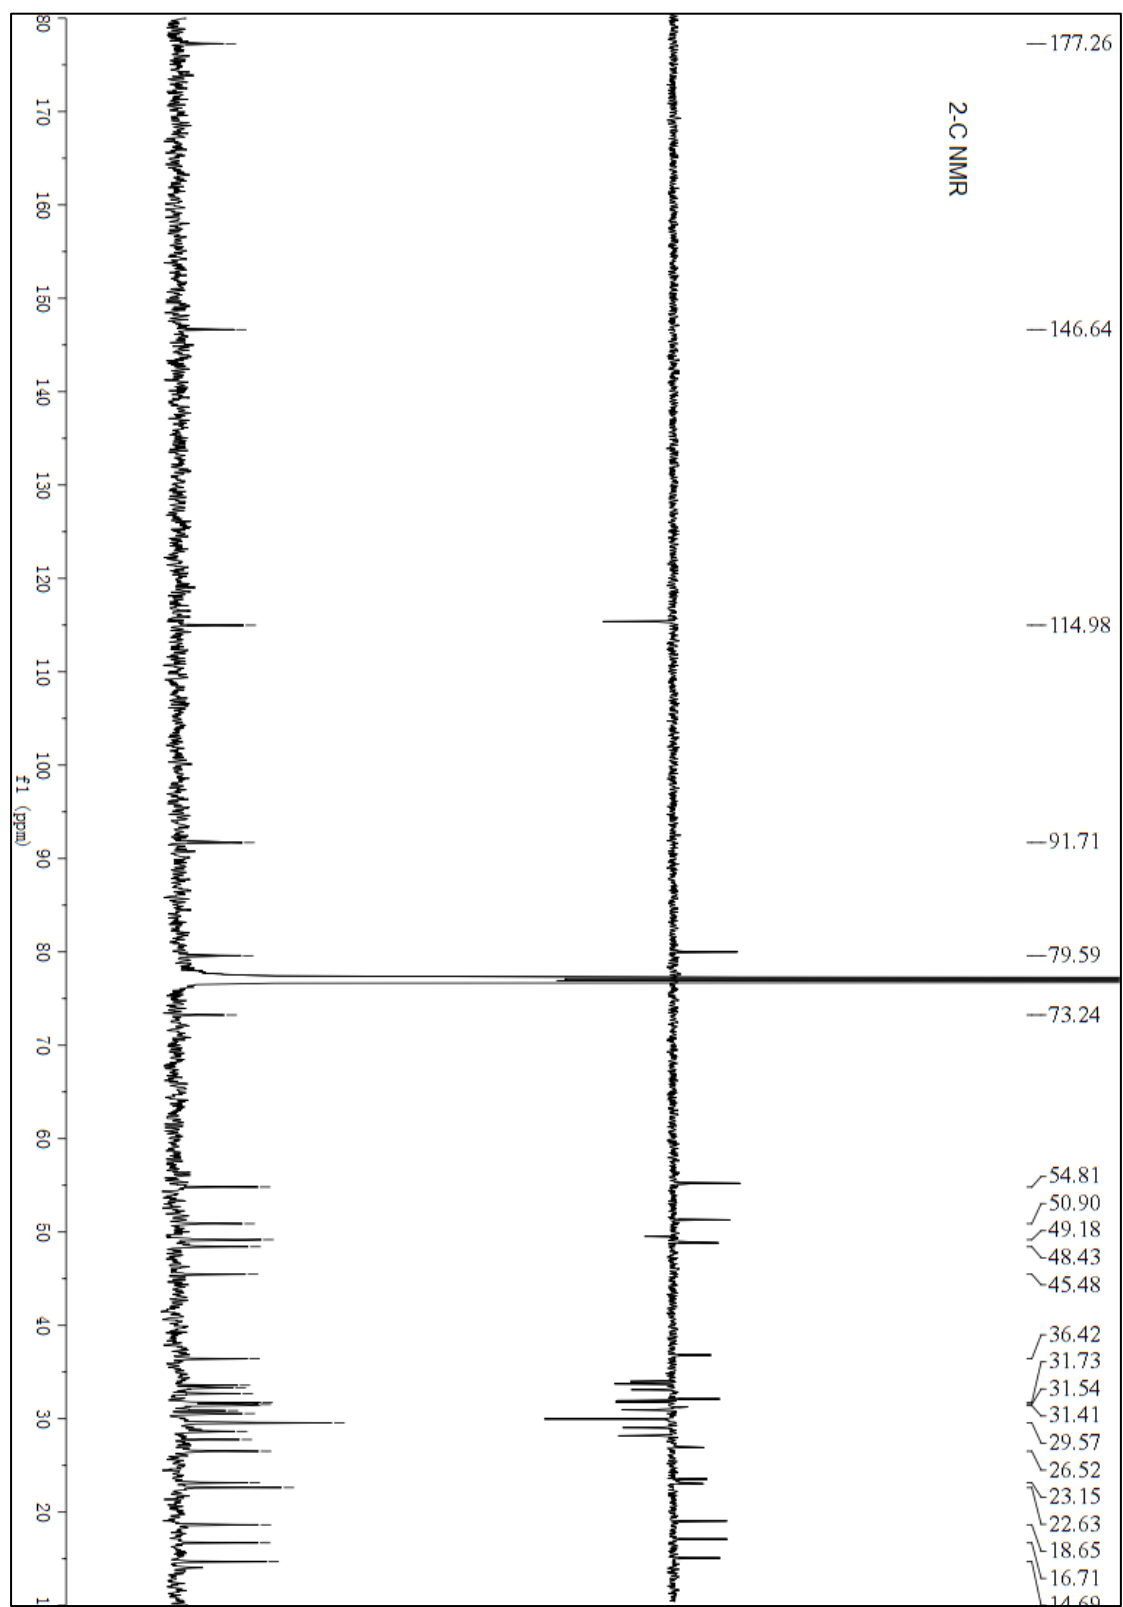

**Figure S13.**  $^1\text{H}$ - $^1\text{H}$  COSY spectrum of Illiciumolide B (**2**)  $\text{CDCl}_3$ .

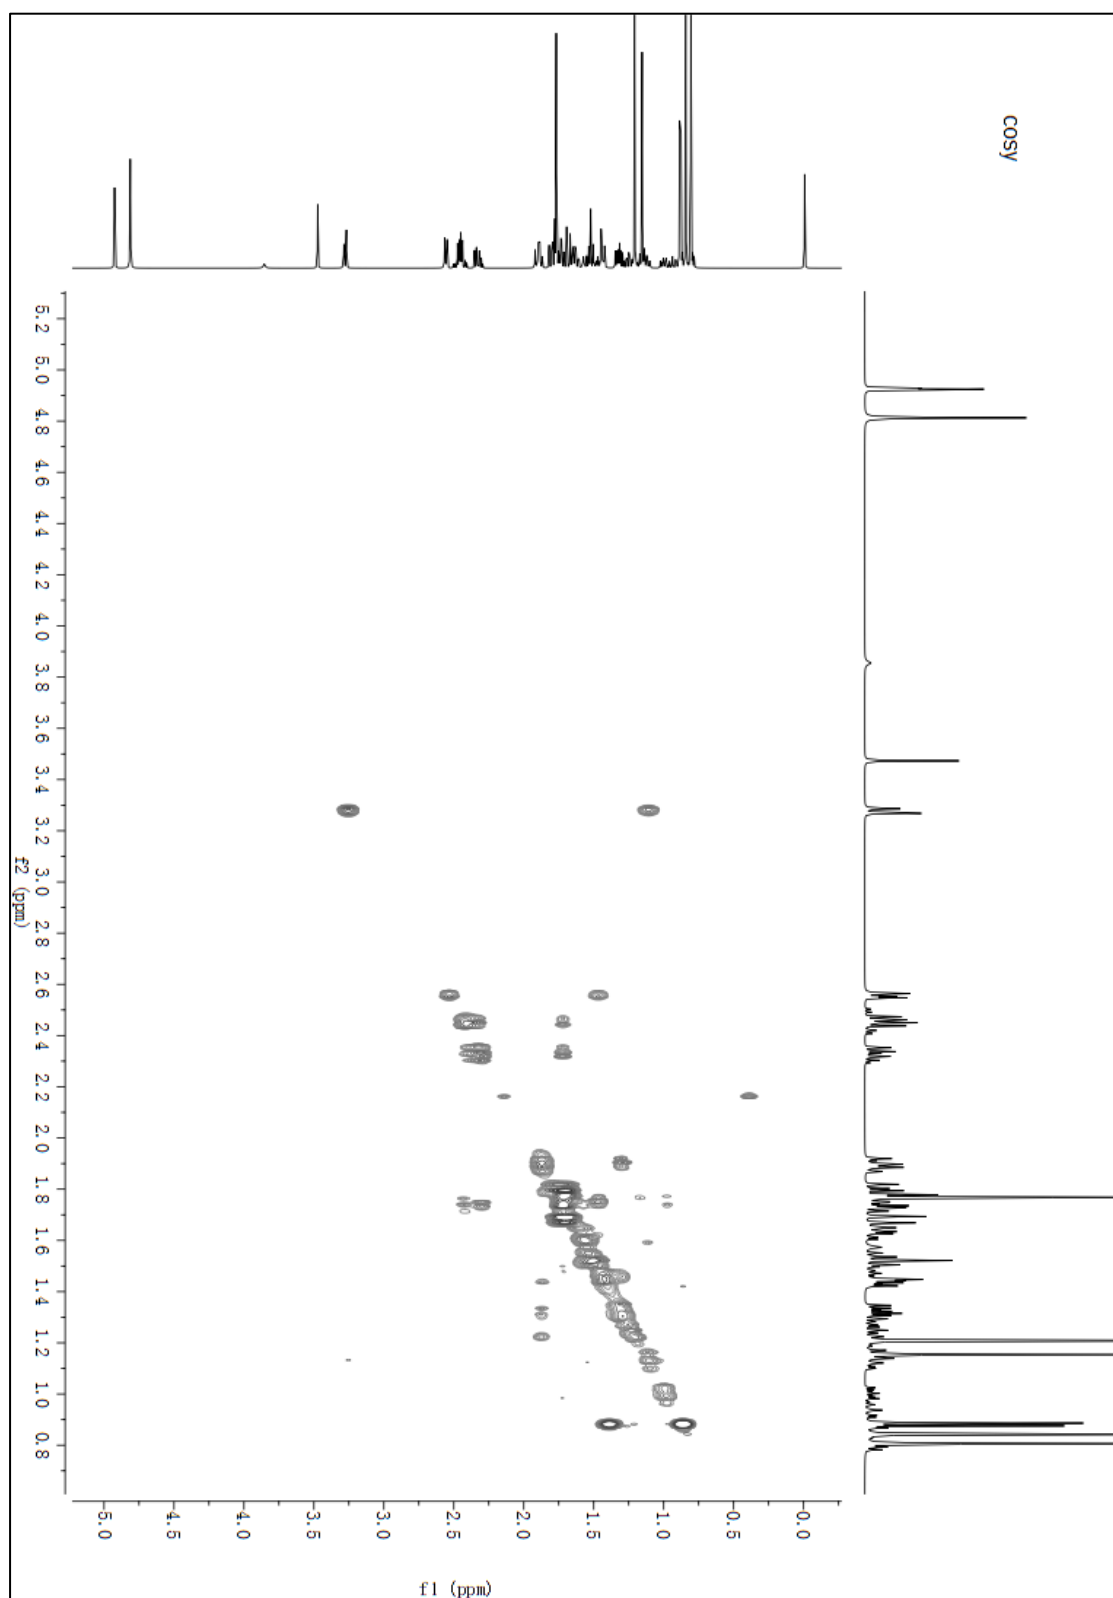



**Figure S14.** HSQC spectrum of Illiciumolide B (**2**) in CDCl<sub>3</sub>.

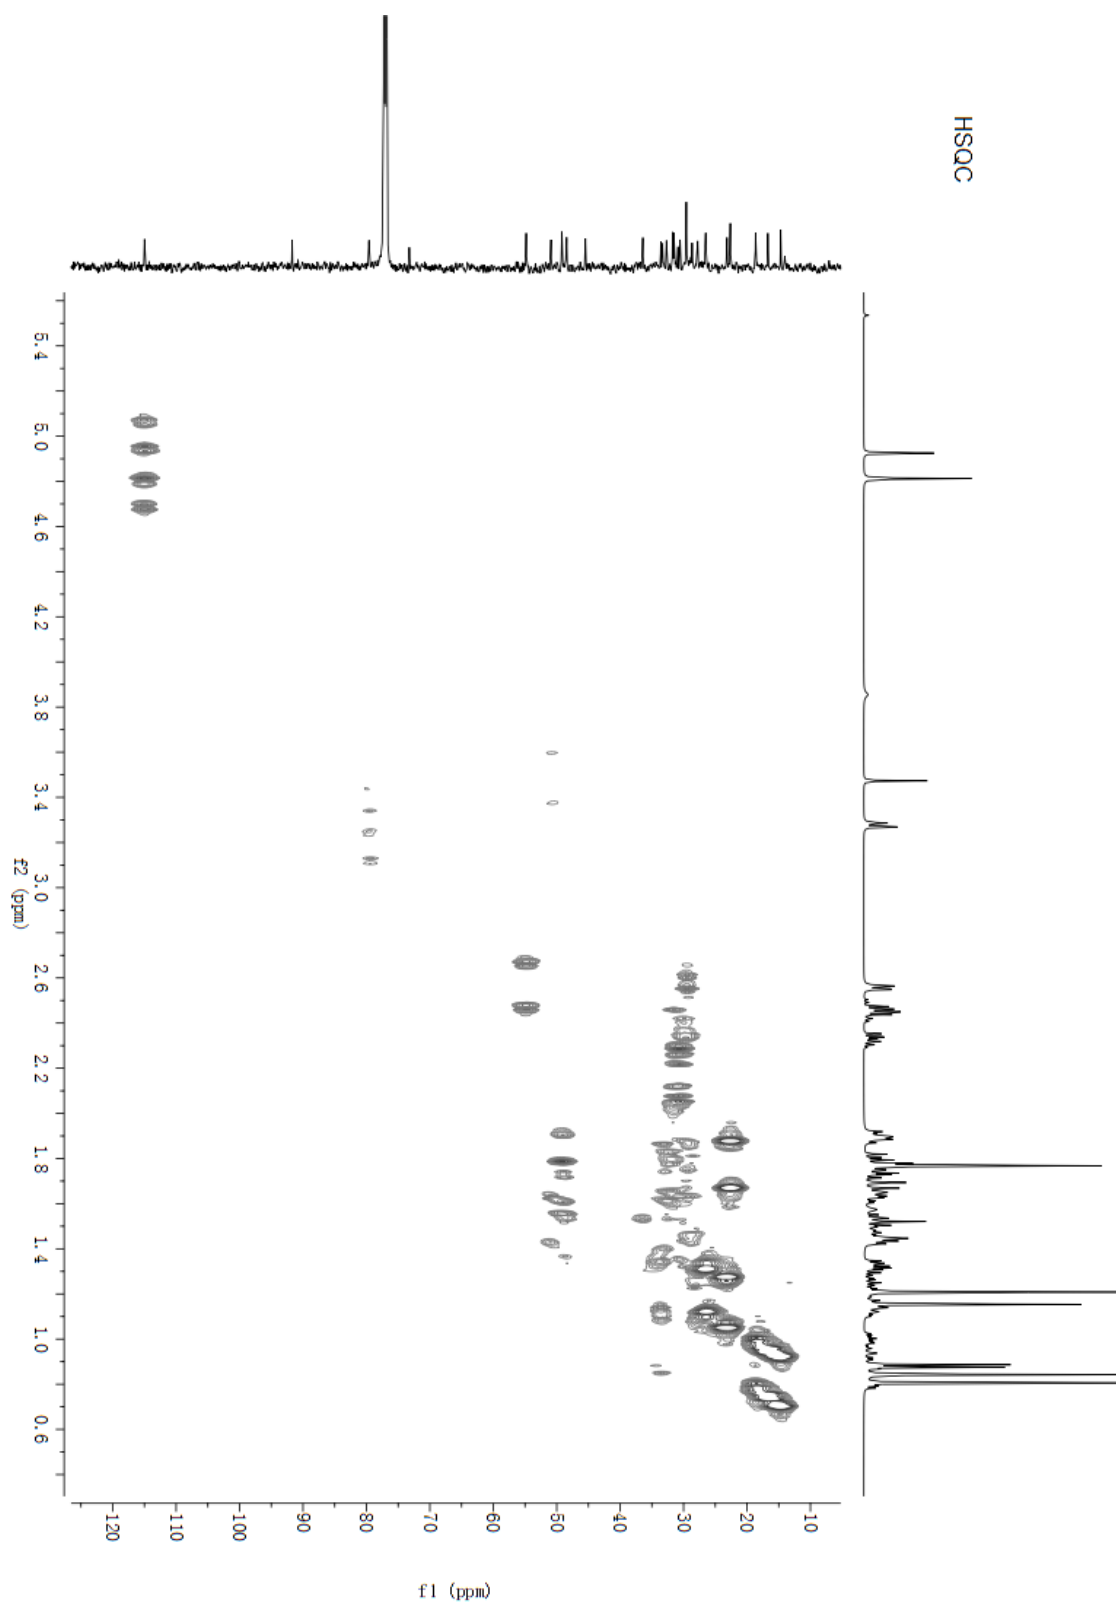

**Figure S15.** HMBC spectrum of Illiciumolide B (**2**) in CDCl<sub>3</sub> (H→C).

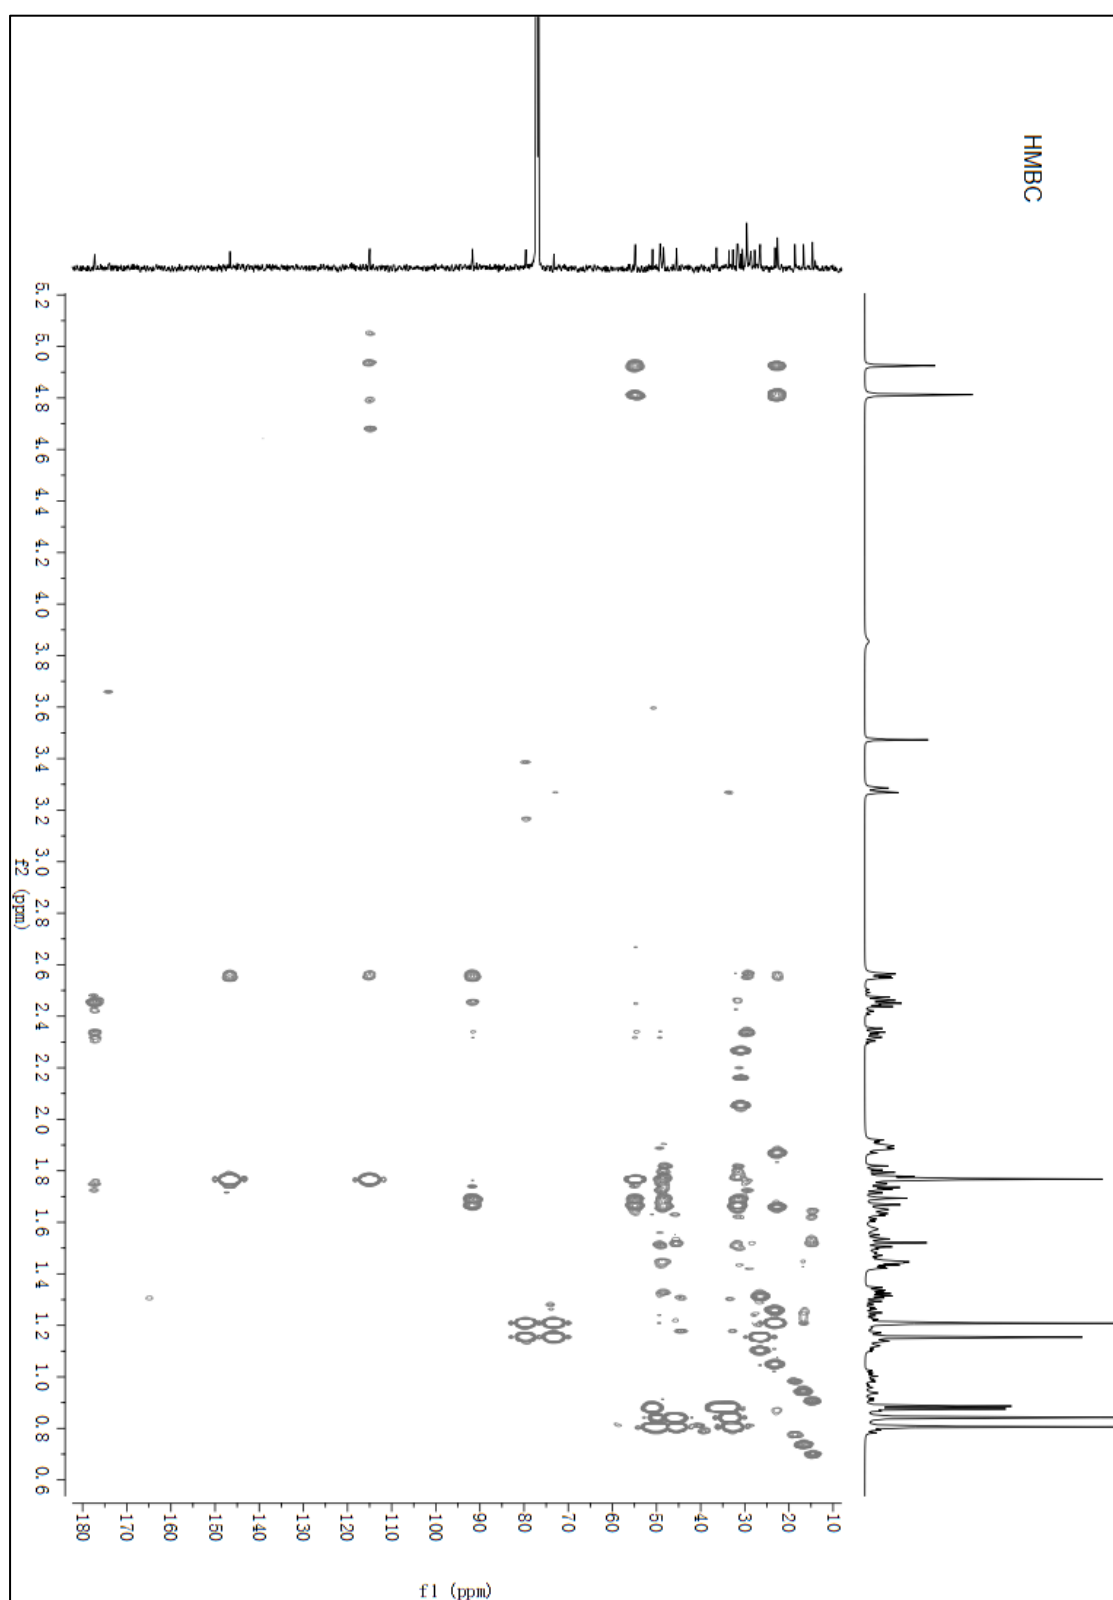

**Figure S16.** NOESY spectrum of Illiciumolide B (**2**) in CDCl<sub>3</sub>.

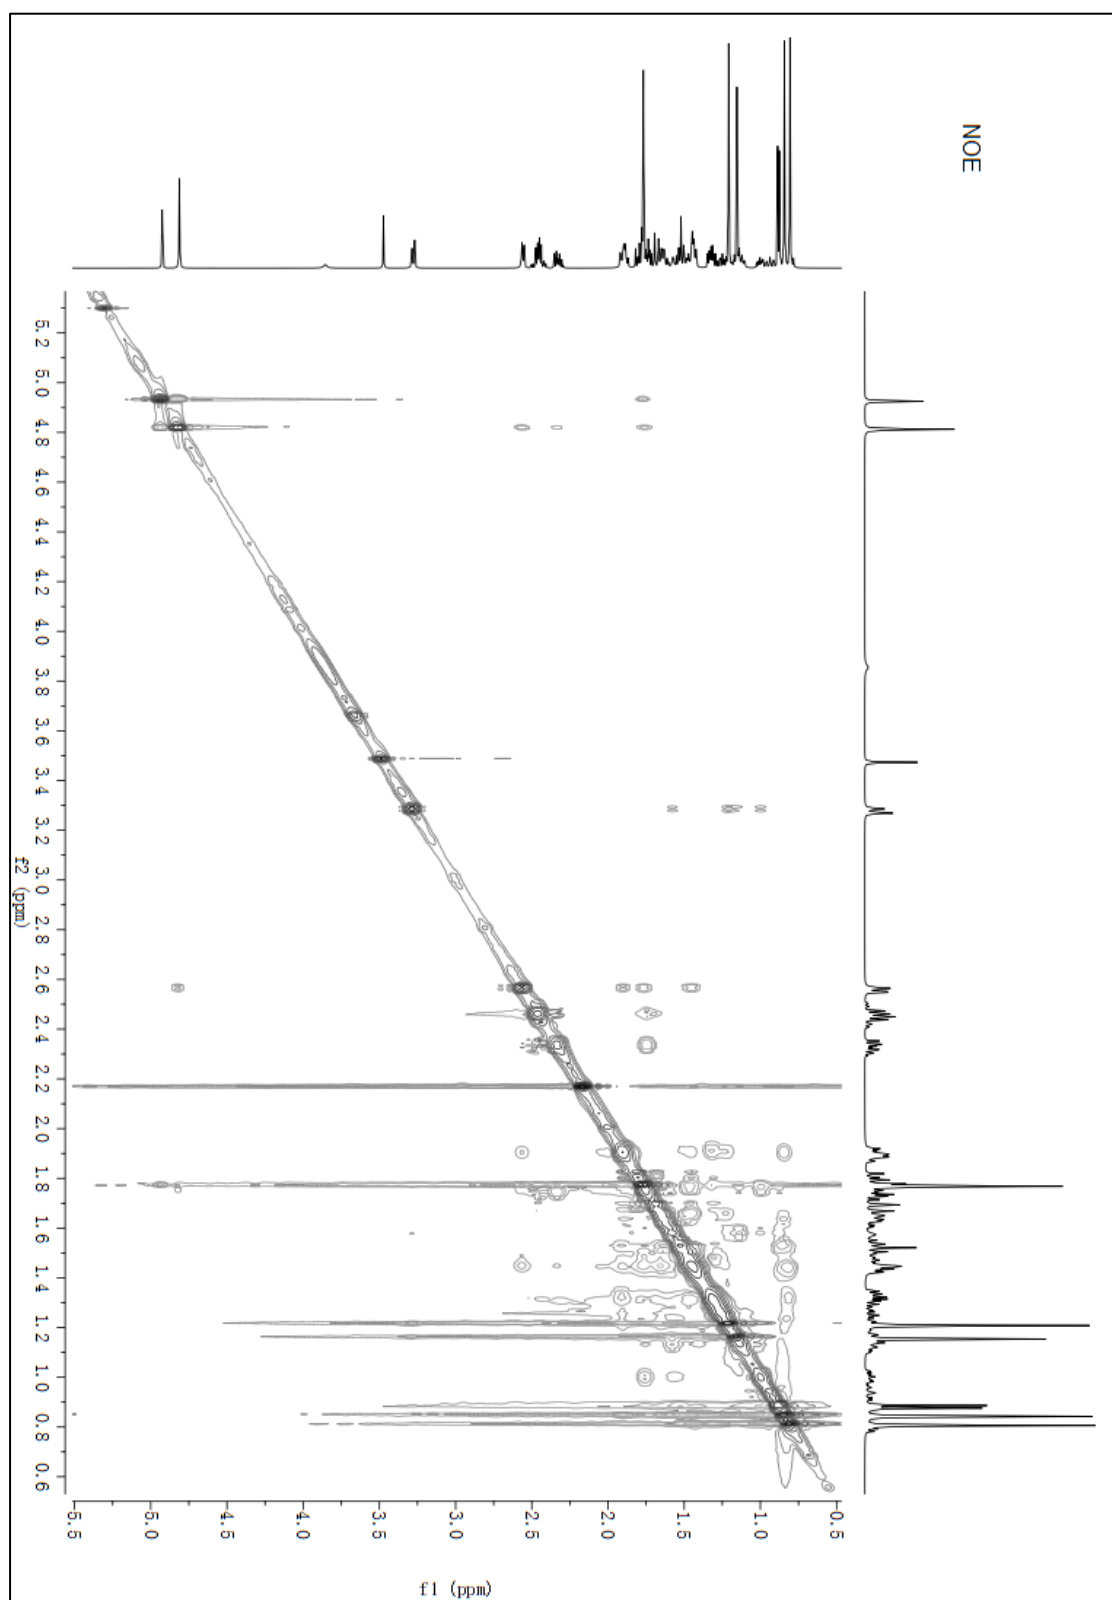

Supplement: f1 [file 942541.f1.pdf]
